# Supplementary material for: Reduced expression of monocyte CD200R is associated with enhanced proinflammatory cytokine production in sarcoidosis
Source: PubMed Central journal article supplement (PMC5144133; doi:10.1038/srep38689), 2016-12-08
Supplement: srep38689-s1.pdf [file srep38689-s1.pdf]

## Supplementary information

### **Reduced expression of monocyte CD200R is associated with enhanced proinflammatory cytokine production in sarcoidosis**

Simon D. Fraser <sup>1</sup>, Laura R. Sadofsky <sup>1</sup>, Paul M. Kaye <sup>2</sup>, Simon P. Hart <sup>1\*</sup>

<sup>1</sup> Department of Academic Respiratory Medicine, Centre for Cardiovascular and Metabolic Research, Hull York Medical School, Castle Hill Hospital, Cottingham, UK, HU16 5JQ

<sup>2</sup> Centre for Immunology and Infection, Department of Biology and Hull York Medical School, University of York, Wentworth Way, York, UK, YO10 5DD

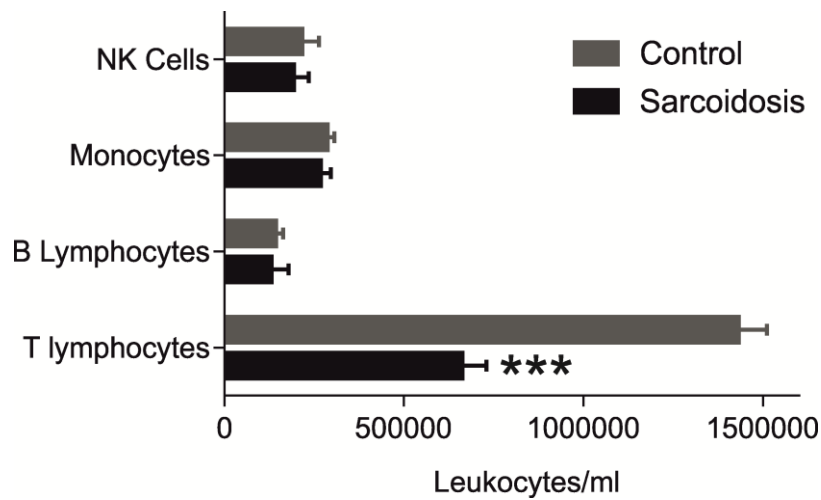

**Figure S1. Peripheral blood mononuclear cell subsets in sarcoidosis subjects demonstrate a T lymphocytopenia.** T lymphocytes (CD3<sup>+</sup>), B lymphocytes (CD19<sup>+</sup>), monocytes (CD14<sup>+</sup>) and Natural Killer cells (CD3<sup>-</sup>CD56<sup>+</sup> lymphocyte gated) were determined by flow cytometry. Data are presented as mean±SEM; using one-way ANOVA with Tukey's *post hoc* test. B-lymphocytes and NK-cells n=10, healthy control T-lymphocytes and Monocytes n=25, sarcoidosis patients T-lymphocytes and monocytes n=22.

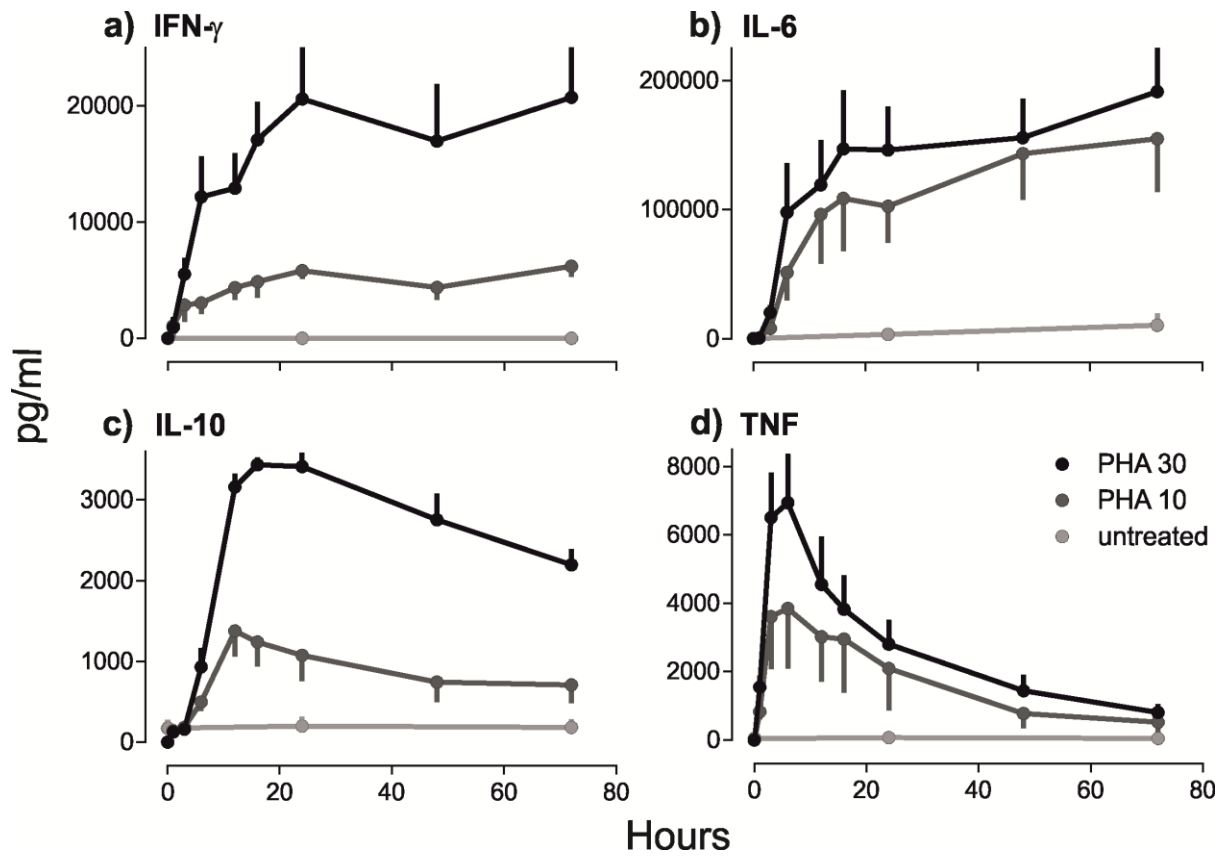

**Figure S2. Cytokine release profiles from whole blood show TNF is produced early.** Whole blood was incubated with PHA (10, 30  $\mu\text{g}/\text{ml}$ ) or left untreated for up to 72 hours. Plasma was collected at intervals for measurements of a) IFN- $\gamma$ , b) IL-6, c) IL-10, and d) TNF. Results are presented as mean  $\pm$  SEM; n=4 healthy controls.

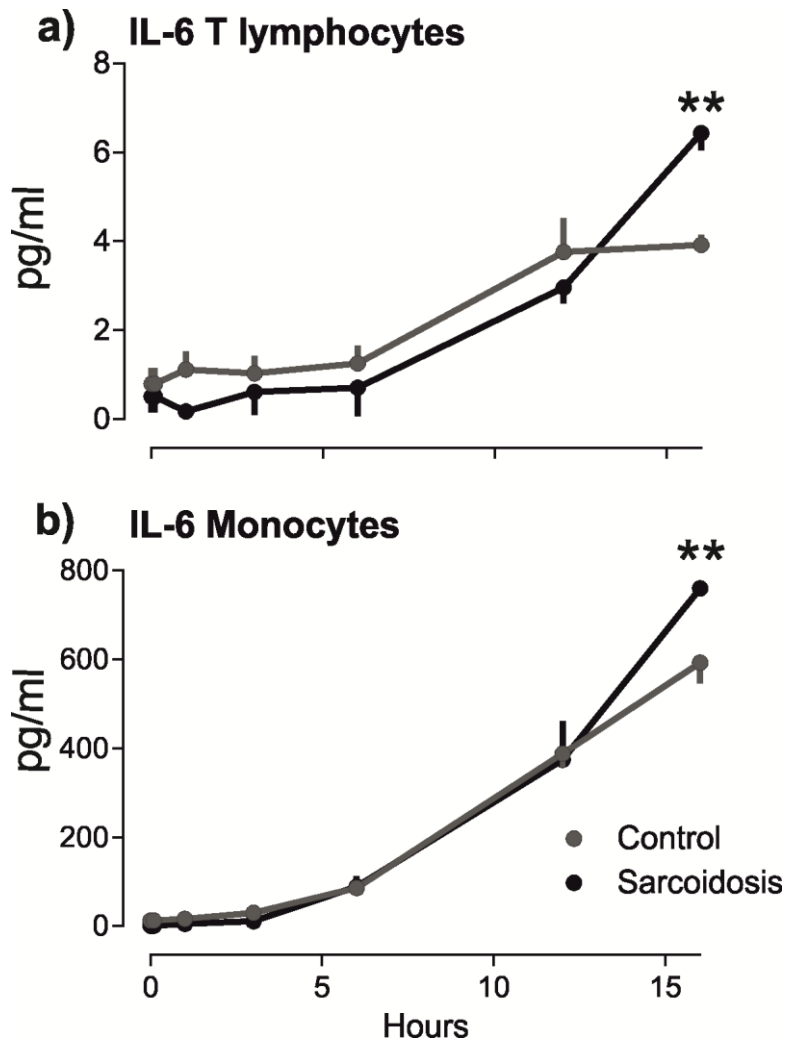

**Figure S3. IL-6 is produced primarily by monocytes.** a) Intracellular accumulation of IL-6 in T-lymphocytes. b) Intracellular accumulation of IL-6 in monocytes. PBMCs were treated with 5 $\mu$ g/ml of Brefeldin A and 10 $\mu$ g/ml of PHA. Results are presented as mean $\pm$ SEM; \*\*= p<0.01 using two-way ANOVA. healthy controls n=3, sarcoidosis patients n=2.

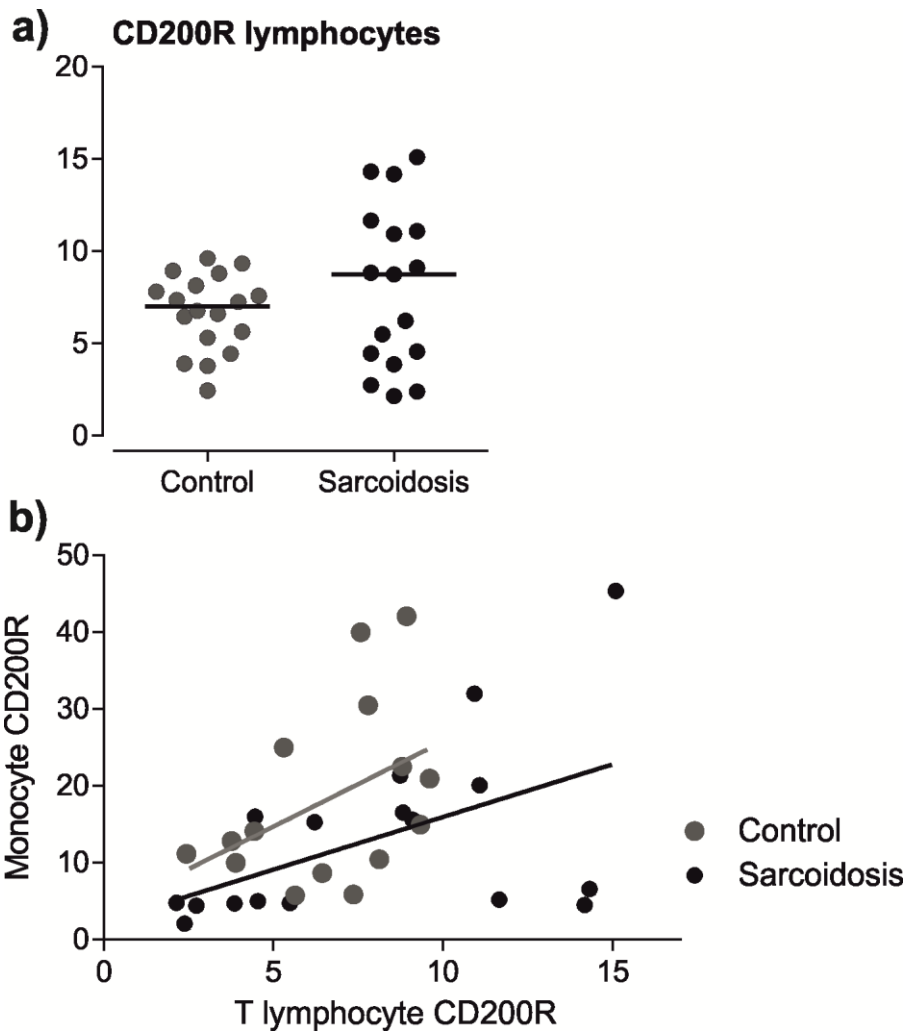

**Figure S4. CD200R expression on T lymphocytes is polarised as low or high expressing populations in sarcoidosis.** a) CD200R expression on T lymphocytes (geometric mean fluorescent units) in patients with sarcoidosis and healthy controls. P=NS using Kolmogorov–Smirnov test. b) Relationship between CD200R expression on T lymphocytes and monocytes within individual subjects. Grey line = linear regression for healthy controls,  $R^2=0.19$ ; black line = linear regression for sarcoidosis patients,  $R^2=0.26$ . Healthy controls n=18, sarcoidosis patients n=17

## Reagents

RPMI 1640 media (Lonza) was supplemented with 10% heat inactivated foetal bovine serum (Gibco) and 100 units/ml penicillin and 100 µg/ml streptomycin (Lonza). Histopaque 1077 (Sigma) was used for separation of PBMCs from whole blood. FACS Blocking Solution was made using PBS and 0.5% protease free high grade bovine serum albumin (Fisher Scientific). ELISA materials not supplied with kits included the ELISA wash buffer (0.05% Tween 20 in 1xPBS (Fisher Scientific)), assay diluent (1% BSA in 1xPBS), 96 well Nunc Maxisorb plates (Fisher Scientific), 1M Sulphuric Acid (VWR) and TMB substrate solution (Vector Laboratories). Phytohaemagglutinin as PHA-P was purchased from Sigma Aldrich and *Staphylococcus enterotoxin A* (SEA) was obtained from Sigma-Aldrich, both were reconstituted and stored as per the manufacturer's instructions. All antibodies for immunophenotyping were obtained from Biolegend and were mouse monoclonal with accompanying matched isotype controls (see Table E1). Antibodies used in intracellular flow cytometry and regulatory receptor characterisation were obtained from Biolegend (see Table E2). CD200 receptor blocking antibody was obtained from R&D Systems, anti-human CD200 R1 polyclonal goat antibody and the control normal goat polyclonal IgG control. CD200 blocking antibody was obtained from R&D systems, human CD200 IgG1 (clone # 325531) and isotype control from Biolegend Human LEAF IgG1.

| Target Protein  | Host Species | Isotype  | Fluorophore | Clone    | Reference Number |
|-----------------|--------------|----------|-------------|----------|------------------|
| CD3             | Mouse        | IgG1, κ  | APC         | UCHT1    | 300412           |
| CD4             | Mouse        | IgG1, κ  | APC         | RPA-T4   | 300514           |
| CD8a            | Mouse        | IgG1, κ  | PE          | HIT8a    | 300908           |
| CD14            | Mouse        | IgG1, κ  | APC         | HCD14    | 325608           |
| CD14            | Mouse        | IgG1, κ  | FITC        | HCD14    | 325604           |
| CD14            | Mouse        | IgG1, κ  | PE          | HCD14    | 325606           |
| CD16            | Mouse        | IgG1, κ  | APC         | B73.1    | 360706           |
| CD25            | Mouse        | IgG1, κ  | FITC        | BC96     | 302604           |
| CD45RA          | Mouse        | IgG2b, κ | FITC        | HI100    | 304148           |
| CD45RO          | Mouse        | IgG2a, κ | PE          | UCHL1    | 304206           |
|                 |              |          |             |          |                  |
| Isotype Control | Mouse        | IgG1, κ  | APC         | MOPC-21  | 400122           |
| Isotype Control | Mouse        | IgG1, κ  | FITC        | MOPC-21  | 400110           |
| Isotype Control | Mouse        | IgG1, κ  | PE          | MOPC-21  | 400114           |
| Isotype Control | Mouse        | IgG2b, κ | FITC        | MPC-11   | 400307           |
| Isotype Control | Mouse        | IgG2a, κ | PE          | MOPC-173 | 400212           |

**Table S1**

| Target Protein                  | Host Species | Isotype         | Fluorophore | Clone    | Reference Number |
|---------------------------------|--------------|-----------------|-------------|----------|------------------|
| IFN- $\gamma$                   | Mouse        | IgG1, $\kappa$  | FITC        | 4S.B3    | 502506           |
| IFN- $\gamma$                   | Mouse        | IgG1, $\kappa$  | PE          | B27      | 506507           |
| IL-6                            | Rat          | IgG1, $\kappa$  | PE          | MQ2-13A5 | 501107           |
| IL-10                           | Rat          | IgG1, $\kappa$  | PE          | JES3-9D7 | 501404           |
| TNF- $\alpha$                   | Mouse        | IgG1, $\kappa$  | PE          | Mab11    | 502909           |
|                                 |              |                 |             |          |                  |
| Isotype Control                 | Mouse        | IgG1, $\kappa$  | FITC        | MOPC-21  | 400138           |
| Isotype Control                 | Mouse        | IgG1, $\kappa$  | PE          | MOPC-21  | 400140           |
| Isotype Control                 | Rat          | IgG1, $\kappa$  | PE          | RTK2071  | 400408           |
|                                 |              |                 |             |          |                  |
|                                 |              |                 |             |          |                  |
| CD47                            | Mouse        | IgG1, $\kappa$  | FITC        | CC2C6    | 323106           |
| CD172a/b (SIRP $\alpha/\beta$ ) | Mouse        | IgG1, $\kappa$  | PE          | SE5A5    | 323806           |
| CD200 (OX2)                     | Mouse        | IgG1, $\kappa$  | PE          | OX-104   | 329206           |
| CD200 Receptor                  | Mouse        | IgG1, $\kappa$  | PE          | OX-108   | 329306           |
| CD210 (IL-10R)                  | Rat          | IgG2a, $\kappa$ | PE          | 3F9      | 308804           |
|                                 |              |                 |             |          |                  |
| Isotype Control                 | Mouse        | IgG1, $\kappa$  | FITC        | MOPC-21  | 400110           |
| Isotype Control                 | Mouse        | IgG1, $\kappa$  | PE          | MOPC-21  | 400114           |
| Isotype Control                 | Rat          | IgG2a, $\kappa$ | PE          | RTK2758  | 400508           |

**Table S2**



| Leukocyte Population                                                                    | Healthy        | Sarcoidosis     | P value  |
|-----------------------------------------------------------------------------------------|----------------|-----------------|----------|
| PBMC number<br>(x10 <sup>6</sup> cells/ml)                                              | 2.03<br>(0.60) | 1.21<br>(0.40)  | < 0.0001 |
| Percentage of monocytes in PBMCs                                                        | 15.1<br>(4.84) | 22.2<br>(8.49)  | 0.001    |
| Lymphocyte:monocyte ratio                                                               | 4.67<br>(2.58) | 2.34<br>(1.50)  | < 0.0001 |
| Percentage of CD3 <sup>+</sup> T lymphocytes in total lymphocytes                       | 72.6<br>(6.42) | 54.4<br>(15.00) | < 0.0001 |
| Ratio of CD4 <sup>+</sup> :CD8 <sup>+</sup> T lymphocytes                               | 1.93<br>(0.99) | 2.28<br>(2.24)  | 0.561    |
| Ratio of naïve to memory T lymphocytes<br>(CD45RA:RO)                                   | 0.86<br>(0.63) | 0.58<br>(0.50)  | 0.185    |
| Percentage of CD19 <sup>+</sup> B lymphocytes in PBMCs                                  | 8.53<br>(4.40) | 11.6<br>(8.80)  | 0.679    |
| Percentage of CD3 <sup>-</sup> CD56 <sup>+</sup> Natural Killer cells in PBMCs          | 11.9<br>(5.46) | 18.5<br>(6.75)  | 0.778    |
| Percentage of CD3 <sup>+</sup> CD56 <sup>+</sup> NK-like T lymphocytes in T lymphocytes | 7.70<br>(3.01) | 5.24<br>(3.39)  | 0.190    |
| Percentage of CD25 <sup>+</sup> activated T lymphocytes in T lymphocytes                | 22.2<br>(6.49) | 28.8<br>(11.0)  | 0.025    |

**Table S3.** Leukocyte populations in subjects with sarcoidosis and healthy controls. Results are presented as mean±SD and analysed by Student's T-test or Mann-Whitney U test (controls n= min 5, max 21, sarcoidosis patients n= min 5, max 19).
